1 Phylogenetic Association and Genetic Factors in Cold Stress Tolerance in *Campylobacter jejuni*

2

3 Jeong In Hur<sup>a,b</sup>, Jinshil Kim<sup>a,b,c\*</sup>, Sangryeol Ryu<sup>a,b,c##</sup>, Byeonghwa Jeon<sup>d#</sup>

4

5 <sup>a</sup> Department of Food and Animal Biotechnology, Research Institute for Agriculture and Life  
6 Sciences, Seoul National University, Seoul, Republic of Korea

7 <sup>b</sup> Department of Agricultural Biotechnology, Seoul National University, Seoul, Republic of  
8 Korea

9 <sup>c</sup> Center for Food and Bioconvergence, Seoul National University, Seoul, Republic of Korea

10 <sup>d</sup> Division of Environmental Health Sciences, School of Public Health, University of Minnesota,  
11 Minneapolis, MN, USA

12

13 Running Head: Cold stress tolerance in *Campylobacter*

14

15

16 #Address correspondence to Byeonghwa Jeon, [bjeon@umn.edu](mailto:bjeon@umn.edu)

17 ##Address correspondence to Sangryeol Ryu, [sangryu@snu.ac.kr](mailto:sangryu@snu.ac.kr)

18 \*Present address: Department of Food Science & Biotechnology, and Carbohydrate Bioproduct  
19 Research Center, Sejong University, Seoul, Republic of Korea

20 Jeong In Hur and Jinshil Kim contributed equally to this work.

21 **ABSTRACT**

22 *Campylobacter jejuni* is a major foodborne pathogen transmitted to humans primarily via  
23 contaminated poultry meat. Since poultry meat is generally processed, distributed, and stored in  
24 the cold chain, the survival of *C. jejuni* at refrigeration temperatures crucially affects human  
25 exposure to *C. jejuni*. Here, we investigated genetic factors associated with cold stress tolerance  
26 in *C. jejuni*. Seventy-nine *C. jejuni* strains isolated from retail raw chicken exhibited different  
27 survival levels at 4°C for 21 days. Multilocus sequence typing (MLST) clonal complex (CC)-21  
28 and CC-443 were dominant among cold stress-tolerant strains, whereas CC-45 was common  
29 among cold stress-sensitive strains. Genome-wide average nucleotide identity (ANI) analysis  
30 identified a phylogenetic cluster associated with cold stress tolerance. Moreover, a pan-genome  
31 analysis revealed 58 genes distinctively present in the cold stress-tolerant phylogenetic cluster.  
32 Among the 58 genes, *cfrA*, encoding the ferric enterobactin receptor involved in ion transport and  
33 metabolism, was selected for further analysis. Remarkably, the viability of a  $\Delta cfrA$  mutant at 4°C  
34 was significantly decreased, while the levels of total reactive oxygen species and intracellular iron  
35 exceeded those in the wild type. Additionally, a knockout mutation of *cfrA* also significantly  
36 decreased the viability of three cold stress-tolerant isolates at 4°C, confirming the role of *cfrA* in  
37 cold stress tolerance. The results of this study demonstrate that unique phylogenetic clusters of *C.*  
38 *jejuni* associated with cold stress tolerance exist and that *cfrA* is a genetic factor contributing to  
39 cold stress tolerance in *C. jejuni*.

40 **IMPORTANCE**

41 The tolerance of foodborne pathogens to environmental stresses significantly affects food safety.  
42 Several studies have demonstrated that *C. jejuni* survives extended exposure to low temperatures,  
43 but the mechanisms of cold stress tolerance are not fully understood. Here, we demonstrate that *C.*  
44 *jejuni* strains in certain phylogenetic groups exhibit increased tolerance to cold stress. Notably,  
45 *cfrA* is present in the phylogenetic cluster associated with cold stress tolerance and plays a role in  
46 *C. jejuni* survival at low temperatures by alleviating oxidative stress. This is the first study to  
47 discover phylogenetic associations involving cold stress tolerance and identify genetic elements  
48 conferring cold stress tolerance in *C. jejuni*.

49

50

51 **KEYWORDS**

52 *Campylobacter jejuni*, cold stress tolerance, ferric enterobactin receptor (CfrA)

## 53 INTRODUCTION

54 *Campylobacter jejuni* is a major cause of acute gastroenteritis in humans (1-3). Human infection  
55 by *C. jejuni* is frequently associated with the consumption of contaminated poultry meat (4, 5),  
56 manifesting clinical symptoms such as diarrhea, abdominal cramps, and fever (6). In some cases,  
57 *C. jejuni* infection can result in Guillain–Barré syndrome, a neuropathy causing muscular paralysis,  
58 as a postinfection complication (7, 8). Food industries in most developed countries adopt cold-  
59 chain processing and distribution of meat products to ensure food safety and quality (3, 9).  
60 Although *C. jejuni*, as a thermotolerant species, can optimally grow at elevated temperatures, such  
61 as 42°C, the survival of *C. jejuni* on poultry meat in the cold chain poses a food safety threat (10,  
62 11).

63 Most foodborne pathogens, such as *Bacillus*, *Salmonella*, and *Escherichia coli*, produce  
64 cold-shock proteins (12-14). When exposed to cold shock, *E. coli* increases the expression of cold-  
65 shock proteins, such as CspA (15, 16), which helps bacteria survive at low temperatures by  
66 disaggregating and reactivating proteins unfolded or misfolded by the temperature downshift (17,  
67 18). As noted above, most human campylobacteriosis cases are primarily caused by the  
68 consumption of contaminated poultry. This suggests that despite the lack of cold-shock proteins,  
69 *C. jejuni* can successfully survive extended exposure to low temperatures of the cold chain during  
70 the distribution and storage of poultry products (11). Studies thus far show that oxidative stress  
71 defense is associated with cold stress tolerance in *Campylobacter* (18, 19). Exposure to cold stress  
72 increases the expression of oxidative stress defense genes in *C. jejuni* (19). Moreover, a knockout  
73 mutation of *sodB* encoding superoxide dismutase (SodB) compromises viability after freeze–thaw  
74 stress (20).

75 Iron is essential for various physiological processes; however, excessive iron disrupts

76 redox homeostasis and catalyzes the generation of reactive oxygen species (ROS) via the Fenton  
77 reaction under stress conditions (21-23). ROS cause oxidative damage to cellular components,  
78 such as DNA and proteins, and can lead to cell death (24). Since the iron-catalyzed Fenton reaction  
79 converts hydrogen peroxide to hydroxyl radicals, the most noxious ROS causing cellular damage,  
80 intracellular free iron levels can be correlated with oxidative stress (23). The expression of iron-  
81 related genes is elevated in *C. jejuni* during cold shock (19), suggesting that iron may play an  
82 essential role in the adaptation of *C. jejuni* to cold shock. However, little is understood about how  
83 *C. jejuni* can tolerate low temperatures of the cold chain during foodborne transmission to humans  
84 via refrigerated poultry meat.

85 To fill this knowledge gap, in this study, we investigated cold tolerance in 79 *C. jejuni*  
86 strains isolated from retail raw chicken in our previous study (25) and discovered that some strains  
87 of *C. jejuni* are highly tolerant to cold stress. Moreover, cold stress tolerance is associated with  
88 specific clonal complexes (CCs), which indicates that strains with cold stress tolerance are  
89 phylogenetically related. By comparing 79 *C. jejuni* isolates and testing them with gene knockout  
90 mutations, we show that *cfrA* contributes to cold stress tolerance in *C. jejuni*. Notably, we  
91 demonstrate that intracellular iron and oxidative stress defense are related to cold stress tolerance  
92 driven by *cfrA* in *C. jejuni*.

93

94

## 95 **RESULTS**

96 **Phylogenetic association with cold stress tolerance in *C. jejuni*.** *C. jejuni* can be isolated from  
97 refrigerated poultry meat and various environmental samples from poultry farms, although it is a  
98 thermotolerant species (26, 27). Thus, we hypothesized that *C. jejuni* circulating in poultry

99 production may have the capability to tolerate cold temperatures. Using 79 *C. jejuni* strains isolated  
100 from retail raw chicken in our previous study (25), we first measured the survival of *C. jejuni* at  
101 refrigeration temperature for 21 days. As the tested strains showed a wide range of viability at 4°C,  
102 we divided the 79 strains into two groups of equal size by their viability at 21 days and designated  
103 them as cold stress-tolerant (n=39) and cold stress-sensitive (n=40), respectively. The viable  
104 counts of the cold stress-tolerant strains at 4°C at all sampling times (7, 14, and 21 days) were  
105 significantly different from those of the cold stress-sensitive strains (Fig. 1A).

106 To determine whether cold stress tolerance is related to bacterial phylogeny in *C. jejuni*,  
107 we compared multilocus sequence typing (MLST) CCs between cold stress-tolerant and cold  
108 stress-sensitive strains. Notably, CC-21 and CC-443 were predominant in cold stress-tolerant  
109 strains (51.3% and 12.8%, respectively), whereas CC-45 was dominant (22.5%) in cold stress-  
110 sensitive strains (Fig. 1B). The associations of CC-21, CC-45, and CC-443 with cold stress  
111 tolerance were statistically significant (Fig. S1). These findings demonstrate that some *C. jejuni*  
112 strains are highly tolerant to low temperatures and that cold stress tolerance is phylogenetically  
113 associated in *C. jejuni*. These data also suggest that genetic elements involved in cold stress  
114 tolerance may exist in *C. jejuni*.

115  
116 ***C. jejuni* strains tolerant or sensitive to cold stress are phylogenetically distinct.** We performed  
117 genome-wide average nucleotide identity (ANI) analysis to further investigate the phylogenetic  
118 association with cold stress tolerance. As a result, we identified four phylogenetic clusters that are  
119 distinctly separate below the 98% ANI threshold: Cluster 1 (n=6), Cluster 2 (n=15), Cluster 3  
120 (n=26), and Cluster 4 (n=32) (Fig. 2). Interestingly, the phylogenetic clusters were related to  
121 MLST CCs and cold stress tolerance. When MLST CCs were compared, Cluster 2 showed a

122 significantly high proportion of CC-45, while CC-443 and CC-21 were highly prevalent in Cluster  
123 3 and Cluster 4, respectively (Fig. 3A). Consistent with the patterns of cold stress tolerance of  
124 these CCs (Fig. 1B), Cluster 2 and Cluster 4 consisted mostly of cold stress-sensitive and cold  
125 stress-tolerant strains, respectively (Fig. S2). Moreover, the viability of *C. jejuni* after 21 days of  
126 exposure to cold stress was significantly different between Cluster 2 and Cluster 4 (Fig. 3B). These  
127 results suggest that cold stress tolerance is associated with genetic backgrounds in *C. jejuni*.

128

129 **Genetic elements are unique to cold stress-tolerant strains of *C. jejuni*.** Cluster 2 and Cluster  
130 4 were phylogenetically distant (Fig. 2) and showed significantly different levels of cold stress  
131 tolerance (Fig. 3B). Thus, we conducted a pan-genome analysis to identify genes potentially  
132 associated with cold stress tolerance by comparing the two clusters. The analysis revealed 58 genes  
133 that are present in the cold-tolerant cluster (i.e., Cluster 4) and absent from the cold-sensitive  
134 cluster (i.e., Cluster 2) (Fig. S3, Table 1). The 58 genes are involved in various functions, including  
135 inorganic ion transport and metabolism, amino acid transport and metabolism, defense  
136 mechanisms, transcription, and carbohydrate transport and metabolism (Table 1). Among the 58  
137 genes discovered by comparing Cluster 2 and Cluster 4, we decided to investigate how iron  
138 metabolism genes can be involved in cold stress tolerance and selected *cfrA* encoding the ferric  
139 enterobactin receptor for further investigation in the remainder of the study. When we examined  
140 the occurrence of *cfrA* in the 79 *C. jejuni* isolates, there was a clear separation of phylogenetic  
141 groups (Fig. 4A). The strains lacking *cfrA* belonged predominantly to CC-45 (60.0%), the CC  
142 associated with cold stress sensitivity, and the strains harboring *cfrA* belonged predominantly to  
143 CC-21 (47.5%), UA (15.3%), CC-354 (11.9%), and CC-443 (10.2%) (Fig. 4B). Notably, these  
144 results are consistent with the results of viability assays and ANI analysis, which also show that

145 strains in CC-45 are related to cold stress sensitivity and that those in CC-21 and CC-443 tend to  
146 be tolerant to cold stress (Figs. 1 and 2). These data suggest that *cfrA* can be involved in cold stress  
147 tolerance in *C. jejuni*.

148

149 **CfrA contributes to the survival of *C. jejuni* at refrigeration temperatures.** Studies show that  
150 a *sodB* mutation compromises the survival of *C. jejuni* at refrigeration temperatures, indicating  
151 that oxidative stress defense is related to cold stress tolerance (18, 19). Intracellular iron affects  
152 oxidative stress through the Fenton chemistry (28, 29). Therefore, we hypothesized that *cfrA* may  
153 be involved in cold stress tolerance by affecting oxidative stress in *C. jejuni* at refrigeration  
154 temperatures. Before testing the hypothesis using the  $\Delta cfrA$  mutant, we questioned whether cold  
155 stress could induce oxidative stress in *C. jejuni*. We observed that exposure to cold stress at 4°C  
156 led to total ROS accumulation in *C. jejuni* (Fig. 5). The levels of total ROS accumulation at 4°C  
157 were similar under microaerobic and aerobic conditions (Fig. 5). These results suggest that *C.*  
158 *jejuni* under cold stress conditions experiences increased oxidative stress at a level similar to that  
159 under aerobic conditions.

160 To further examine whether *cfrA* is involved in cold stress tolerance, we constructed a  
161  $\Delta cfrA$  mutant. In addition to genetic confirmation of a mutation by sequencing (data not shown),  
162 the mutation was confirmed phenotypically by observing a defect in the uptake of the ferric  
163 enterobactin complex in the  $\Delta cfrA$  mutant (Fig. 6A). Remarkably, the viability of a  $\Delta cfrA$  mutant  
164 at 4°C was significantly decreased compared to that of the wild type (WT) (Fig. 6B). Genetic  
165 complementation of the  $\Delta cfrA$  mutant with an intact copy of *cfrA* fully restored cold stress  
166 tolerance to the WT level (Fig. 6B). Since *cfrA* is related to iron metabolism, we measured the  
167 intracellular iron level before and after exposure to cold stress. Interestingly, a  $\Delta cfrA$  mutation



168 significantly elevated the iron level (Fig. 6C). These results suggest that *cfrA* is associated with  
169 the control of intracellular iron levels in *C. jejuni* under cold stress conditions. Moreover, exposure  
170 to cold stress significantly increased ROS levels in the  $\Delta cfrA$  mutant compared to WT (Fig. 6D).  
171 These results suggest that *C. jejuni* confronts increased oxidative stress at cold temperatures and  
172 that *cfrA* contributes to cold stress tolerance by controlling intracellular iron and oxidative stress.  
173 Finally, we confirmed the role of *cfrA* in cold stress tolerance using three cold stress-tolerant  
174 isolates. The three strains were selected from CCs that comprise large proportions among cold  
175 stress-tolerant strains: CS14 (CC-443), CS49 (CC-21), and CS62 (CC-443). We constructed  $\Delta cfrA$   
176 mutants of the three cold stress-tolerant strains to validate the role of *cfrA* in cold stress-tolerant  
177 strains. Notably, a knockout mutation of *cfrA* significantly compromised the viability of the three  
178 cold stress-tolerant strains of *C. jejuni* at 4°C when compared to their WTs (Fig. 6E). These data  
179 suggest that *cfrA* contributes to cold stress tolerance in *C. jejuni* by alleviating oxidative stress.

180

181

## 182 **DISCUSSION**

183 *C. jejuni* is a major foodborne pathogen transmitted to humans via contaminated poultry meat.  
184 Considering the use of the cold chain to process and distribute poultry meat, cold stress is one of  
185 the major stress conditions *C. jejuni* must overcome during foodborne transmission to humans.  
186 However, little attention has been given to cold stress tolerance in *C. jejuni*. Here, we tested cold  
187 stress tolerance in 79 *C. jejuni* strains isolated from retail raw chicken and discovered that the level  
188 of cold stress tolerance varies in *C. jejuni* depending on the strain (Fig. 1A). Moreover, strains in  
189 CC-21 and CC-443 were significantly more likely to show cold stress tolerance, and those in CC-  
190 45 were more likely to exhibit cold stress sensitivity (Fig. 1B). A previous study also showed that

191 *C. jejuni* strains belonging to CC-21 survived better at 4°C than those in CC-45 (31). Phylogenetic  
192 studies demonstrate that CC-21 and CC-443 are closely related to each other, whereas CC-45 is  
193 more distant (32, 33). CC-21 and CC-45 are the major generalist CCs occupying the diverse  
194 population of *C. jejuni* isolated from multiple different hosts, such as chickens, cattle, and wild  
195 birds (34-36). CC-443 is frequently associated with chickens (33). An MLST analysis of 1,215  
196 isolates from human campylobacteriosis cases in New Zealand over nine years showed that CC-  
197 45 is characteristic in summer, while CC-21 peaks in late autumn to early winter, exhibiting the  
198 seasonal prevalence of *C. jejuni* strains belonging to CC-21 and CC-45 (37). A similar pattern of  
199 summer seasonality of CC-45 has also been reported in the UK (30). Based on the association of  
200 CC-45 with cold stress sensitivity revealed in this study (Fig. 1B), it can be speculated that *C.*  
201 *jejuni* strains belonging to CC-45 may be less prevalent in poultry production environments in  
202 winter and may cause human infections primarily in summer.

203

204 The phylogenetic analysis using whole-genome sequences divided the 79 strains into four  
205 clusters based on ANI analysis (Fig. 2) and identified two clusters associated with cold stress  
206 tolerance (Fig. 3). Comparing the genome sequences between the two clusters led to the  
207 identification of 58 genes present in *C. jejuni* strains in the cold stress-tolerant cluster and absent  
208 from the strains in the cold stress-sensitive cluster (Table 1). Based on previous efforts to identify  
209 genes involved in human campylobacteriosis (38, 39), interestingly, most of the 58 genes unique  
210 to the cold stress-tolerant cluster are present only in clinical isolates and absent from nonclinical  
211 isolates, including *kpsA* (encoding potassium-transporting ATPase subunit), *uxaA* (encoding  
212 UxaA family hydrolase), *cfrA* (encoding ferric enterobactin receptor) and others. Although it  
213 remains unexplained whether these genes are related to the pathogenicity of *C. jejuni*, it can be

214 speculated that cold stress-tolerant strains are more likely to cause human infection than cold  
215 stress-sensitive strains because cold tolerance enables *C. jejuni* to survive on poultry meat, the  
216 primary cause of campylobacteriosis, in the food supply chain and increases the chances of human  
217 exposure to *C. jejuni*.

218

219 Notably, our findings demonstrate that *cfrA* plays a role in cold stress tolerance in *C. jejuni*.  
220 In a previous study, genes related to iron metabolism, including *cfrA*, were found to be crucial for  
221 bacterial survival under stressful conditions during host colonization (40). The phylogenetic  
222 analysis of core gene alignment shows a clear distinction between *cfrA*-positive and *cfrA*-negative  
223 phylogenies (Fig. 4A). CC-21 & CC-443 and CC-45, which are correlated with cold stress  
224 tolerance and sensitivity, respectively, are separated based on the presence of *cfrA* (Fig. 4B).  
225 Remarkably, the viability of the  $\Delta cfrA$  mutant at 4°C was significantly compromised compared to  
226 that of WT (Fig. 6B). A  $\Delta cfrA$  mutation also reduced cold stress tolerance in cold stress-tolerant  
227 isolates (Fig. 6E). Altogether, these results are the first to present the role of CfrA in cold stress  
228 tolerance in *C. jejuni*.

229

230 Studies have shown the association of oxidative stress defense with cold stress tolerance in  
231 *C. jejuni*. In particular, a mutation of *sodB* encoding superoxide dismutase makes *Campylobacter*  
232 susceptible to freeze–thaw stress (20, 41). We found that oxidative stress increases when *C. jejuni*  
233 is exposed to refrigeration temperatures (Fig. 6D). The levels of total ROS accumulation were  
234 similar between microaerobic and aerobic conditions (Fig. 5), indicating oxidative stress increases  
235 in *C. jejuni* at refrigeration temperatures regardless of oxygen level. A similar observation has  
236 been reported in another bacterium, where growth at 4°C increased oxidative stress and generated

237 ROS in *Pseudomonas fluorescens* MTCC 667, an isolate from Antarctica (42). Presumably,  
238 reduced carbon metabolism at low temperatures may decrease the formation of the reducing  
239 compounds NADH and FADH<sub>2</sub>, subsequently increasing oxidative stress. In addition, we also  
240 observed that exposure to refrigeration temperatures increased the intracellular level of iron in *C.*  
241 *jejuni* (Fig. 6C). A knockout mutation of *cfrA* increased the levels of iron and total ROS (Fig. 6C  
242 and D), which may decrease viability at refrigeration temperatures because an iron upshift leads  
243 to oxidative stress and can trigger cell death. These data suggest that CfrA contributes to the control  
244 of intracellular iron and redox homeostasis in *C. jejuni* at refrigeration temperatures.

245

246 In summary, we demonstrated for the first time the phylogenetic association with cold stress  
247 tolerance in *C. jejuni* and showed that specific CCs are associated with cold stress tolerance. We  
248 also identified genes unique to the cold stress-tolerant cluster. Finally, we revealed that *cfrA*  
249 contributes to cold stress tolerance by controlling intracellular iron levels and oxidative stress.  
250 Future studies will need to elucidate the molecular mechanisms of cold stress tolerance driven by  
251 *cfrA*.

252

## 253 MATERIALS AND METHODS

254 **Bacterial strains and culture conditions.** Seventy-nine *Campylobacter jejuni* strains previously  
255 isolated from retail raw chicken were used in this study (25). *C. jejuni* NCTC 11168 was used as  
256 a reference strain in this study. The *C. jejuni* strains were routinely grown on Mueller–Hinton (MH)  
257 agar (Oxoid, Hampshire, UK) at 42°C for 18-24 h under microaerobic conditions (85% N<sub>2</sub>, 5% O<sub>2</sub>,  
258 and 10% CO<sub>2</sub>) generated by Anoxomat (Mart Microbiology BV, Lichtenvoorde, The Netherlands).

259

260 **Cold stress tolerance test of *C. jejuni*.** The survival of *C. jejuni* at 4°C was measured as described  
261 previously (43), with slight modifications. Briefly, an overnight culture on MH agar was  
262 resuspended in MH broth to an optical density of 600 nm (OD<sub>600</sub>) of 0.1 (ca, 10<sup>9</sup> CFU/mL). The  
263 bacterial suspension was transferred to multiple 96-well plates in 200µL aliquots. To prevent  
264 sample desiccation, outer wells were filled with an equal volume of distilled water, and a container  
265 with water was placed near the 96-well plates. Wooden sticks were placed under both sides of the  
266 lids of the 96-well plates to improve air circulation. The 96-well plates were incubated at 4°C  
267 under aerobic conditions, and samples were taken after 0, 7, 14, and 21 days for serial dilution and  
268 bacterial counting. The strains with viable cells greater than 7.0 x 10<sup>7</sup> CFU/mL after 21 days were  
269 called cold stress-tolerant strains, while those with viable cells less than 7.0 x 10<sup>7</sup> CFU/mL after  
270 21 days were called cold stress-sensitive strains.

271

272 **Whole-genome sequencing.** Genomic DNA (gDNA) was extracted using a NucleoSpin Microbial  
273 DNA kit (Macherey-Nagel, PA, USA) and TissueLyser II (Qiagen, Hilden, Germany) according  
274 to the manufacturer's instructions. A NanoDrop spectrophotometer (Thermo Fisher Scientific, OH,  
275 USA), gel electrophoresis, and Qubit Fluorometer (Thermo Fisher Scientific, OH, USA) were used  
276 to evaluate the quality of the gDNA. After the quality control of gDNA, the DNA library was  
277 prepared using the TruSeq Nano DNA LT Library Prep Kit (Illumina, CA, USA) according to the  
278 TruSeq Nano DNA Library Preparation protocol. The quality of the libraries was assessed on a  
279 2100 Bioanalyzer System with a DNA1000 Chip (Agilent Technologies, CA, USA). Then, the  
280 constructed DNA libraries were sequenced with a 2 × 150 bp read length using the NextSeq 500  
281 Sequencing System (Illumina, CA, USA).

282

283 **Bioinformatics analysis.** Trimming and *de novo* assembly of raw reads generated from the whole  
284 genome sequencing were performed using CLC Genomic Workbench v20 with default parameters.  
285 Then, the assembled genomes were annotated using Prokka v1.14.6 with default parameters. To  
286 specify the degree of overall relatedness among genomes, we estimated the genome-wide ANI  
287 using FastANI v1.33. ANI estimates the average nucleotide identity of all orthologous genes  
288 shared between any two genomes. Organisms belonging to the same species typically exhibit 95%  
289 or higher ANI. Pairwise ANI values were visualized using a heatmap generated by  
290 ComplexHeatmap v2.2.0 and gplots v3.3.5 in R, dividing the strains into four phylogenetic clusters.  
291 In a search for characteristic genes present in the cold-tolerant cluster, pan-genome analysis was  
292 performed with Roary v3.11.2. For comparative analyses of the presence or absence of *cfrA*,  
293 minimum spanning trees were generated and visualized in GrapeTree v1.5.0 with core genome  
294 alignment obtained from Roary. Only the strains for which the presence or absence of *cfrA* was  
295 confirmed by PCR were used for the analysis described above. The primer sets are listed in Table  
296 S1.

297  
298 **Construction of  $\Delta cfrA$  mutants and a *cfrA*-complemented strain.** A suicide plasmid carrying  
299 *cfrA* was constructed as described previously (44). Briefly, *cfrA* and its flanking region were  
300 amplified by PCR with GXL polymerase (Takara, Tokyo, Japan) from *C. jejuni* with the primers  
301 presented in Table S1. After digestion with *SalI* and *BamHI*, the PCR products were each ligated  
302 to pUC19 that had been treated with the same enzymes. The pUC19 plasmid containing *cfrA* was  
303 amplified by PCR from inside the gene with inverse primers using the same polymerase and ligated  
304 to a kanamycin cassette from pMW10. The suicide vectors were commercially sequenced by  
305 Bionics (Seoul, South Korea). These three plasmids were used as suicide vectors, and each vector

306 was introduced into WT by electroporation. The *C. jejuni* culture was grown on MH agar plates  
307 containing kanamycin (50 µg/mL) to screen for  $\Delta cfrA$  mutants. The *cfrA* mutation was confirmed  
308 by PCR and sequencing.

309 The complementation strain was constructed as previously described (45). Briefly, DNA fragments  
310 containing the intact copy of *cfrA* were amplified with primer pairs and cloned into a *NotI* site on  
311 a pUC19 derivative carrying an rRNA gene cluster (46, 47). Plasmids carrying *cfrA* were  
312 sequenced by Bionics (Seoul, South Korea) and used as complementation vectors. The  
313 complementation vectors were introduced into *cfrA* knockout mutants by electroporation. To  
314 screen for *cfrA* complementation strains, the *Campylobacter* culture was grown on MH agar plates  
315 containing kanamycin (50 µg/mL) and chloramphenicol (12.5 µg/mL). Complementation of *cfrA*  
316 was confirmed by PCR and sequencing.

317

318 **Measurement of ROS levels.** ROS levels were measured as described previously with slight  
319 modifications (48). Total ROS accumulation level was measured using the fluorescent dye CM-  
320 H<sub>2</sub>DCFDA (Thermo Fisher Scientific, OH, USA). *C. jejuni* was prepared by an overnight culture  
321 on MH agar and resuspended in MH broth to an OD<sub>600</sub> of 0.1. The bacterial suspension was  
322 transferred to a disposable culture tube (Kimble, NJ, USA) and incubated at 4°C. Samples were  
323 taken before and after exposure to cold stress for 4 days. After treatment with 10 µM CM-  
324 H<sub>2</sub>DCFDA for 30 min at room temperature, fluorescence was measured with a SpectraMax i3  
325 Platform (Molecular Devices, CA, USA) at 495 nm excitation and 527 nm emission wavelengths.  
326 The fluorescence levels were normalized to the protein amounts determined with the Bradford  
327 assay (Bio-Rad, CA, USA).

328

329 **Growth promotion assay.** As previous studies demonstrated that *Campylobacter* used ferric  
330 enterobactin as a sole source of iron during growth promotion assays (49), we measured the growth  
331 of *C. jejuni* strains as previously described (50). Briefly, an overnight culture on MH agar was  
332 resuspended in MH broth to an OD<sub>600</sub> of 0.1. *C. jejuni* cells were grown in a disposable glass tube  
333 to log-phase. Deferoxamine mesylate salt (DFO) (Sigma Aldrich, MO, USA), a chelator, was  
334 added to melted MH agar at a final concentration of 20 µM. The cells were mixed with DFO-  
335 containing MH agar and adjusted to approximately 10<sup>7</sup> CFU/mL. Each sample mixture was poured  
336 into Petri dishes for solidification. A sterile disk containing 25 µL of enterobactin (2 mM) (Sigma  
337 Aldrich, MO, USA) was placed on the surface of the agar in each dish. Autoclaved distilled water  
338 was used instead of enterobactin as a negative control.

339

340 **Measurement of intracellular iron levels.** Levels of intracellular iron were measured as  
341 described previously (51). An overnight culture on MH agar was resuspended in MH broth to an  
342 OD<sub>600</sub> of 0.1. *C. jejuni* cells were transferred to disposable culture tubes (Kimble, NJ, USA) in 3-  
343 mL aliquots and incubated at 4°C. Samples were taken before and after exposure to cold stress for  
344 4 days. Briefly, the samples were washed twice with ice-cold PBS and disrupted with a sonicator.  
345 A standard curve was obtained by diluting 1 mM FeCl<sub>3</sub> (Sigma Aldrich, MO, USA) standard  
346 solution. The samples were mixed with an iron-detection reagent (6.5 mM ferrozine, 6.5 mM  
347 neocuproine, 2.5 M ammonium acetate, and 1 M ascorbic acid) and incubated at room temperature  
348 for 30 min. The absorbance was measured with a SpectraMax i3 Platform (Molecular Devices,  
349 CA, USA) at 550 nm. The intracellular iron levels were normalized to the protein concentrations  
350 determined with Bradford assay (Bio-Rad, CA, USA).

351



352 **Statistical analysis.** A chi-square test was performed when comparing proportions. The Student's  
353 *t* test was performed for comparative analysis between two groups. GraphPad Prism (Version 8.0.1;  
354 GraphPad Software, Inc., CA, USA) was used for statistical analysis.

355

356 **Data availability.** The GenBank accession numbers for the genome sequences of all 79 *C. jejuni*  
357 isolates used in the study are presented in Table S2.

358 **ACKNOWLEDGMENTS**

359 J.I.H. and J.K. were supported by the BK21 Plus Program of the Department of  
360 Agricultural Biotechnology, Seoul National University, Seoul, Korea. This research was supported  
361 by a grant 19162MFDS037 from Ministry of Food and Drug Safety in 2021. This research was  
362 supported by Basic Science Research Program through the National Research Foundation of Korea  
363 (NRF) funded by the Ministry of Education (NRF-2021R1I1A1A01050990). B.J. is supported by  
364 MnDRIVE (Minnesota's Discovery, Research, and InnoVation Economy).

365 S.R. and B.J. designed the study. J.I.H. and J.K. performed the experiments. J.I.H., J.K.,  
366 S.R., and B.J. analyzed the data. J.I.H., J.K., and B.J. wrote the manuscript. J.I.H., J.K., S.R., and  
367 B.J. critically reviewed the manuscript.

368 We declare no conflicts of interest.

369 **REFERENCES**

- 370 1. Park SF. 2002. The physiology of *Campylobacter* species and its relevance to their role as  
371 foodborne pathogens. *Int J Food Microbiol* 74:177-188. [https://doi.org/10.1016/s0168-](https://doi.org/10.1016/s0168-1605(01)00678-x)  
372 [1605\(01\)00678-x](https://doi.org/10.1016/s0168-1605(01)00678-x).
- 373 2. Acheson D, Allos BM. 2001. *Campylobacter jejuni* infections: update on emerging issues  
374 and trends. *Clin Infect Dis* 32:1201-1206. <https://doi.org/10.1086/319760>.
- 375 3. Coker AO, Isokpehi RD, Thomas BN, Amisu KO, Obi CL. 2002. Human  
376 campylobacteriosis in developing countries. *J Emerg Infect Dis* 8:237-243.  
377 <https://doi.org/10.3201/eid0803.010233>.
- 378 4. Newell D, Fearnley C. 2003. Sources of *Campylobacter* colonization in broiler chickens.  
379 *J Appl Environ Microbiol* 69:4343-4351. [https://doi.org/10.1128/aem.69.8.4343-](https://doi.org/10.1128/aem.69.8.4343-4351.2003)  
380 [4351.2003](https://doi.org/10.1128/aem.69.8.4343-4351.2003).
- 381 5. Rosenquist H, Nielsen NL, Sommer HM, Nørrung B, Christensen BB. 2003. Quantitative  
382 risk assessment of human campylobacteriosis associated with thermophilic  
383 *Campylobacter* species in chickens. *Int J Food Microbiol* 83:87-103.  
384 [https://doi.org/10.1016/s0168-1605\(02\)00317-3](https://doi.org/10.1016/s0168-1605(02)00317-3).
- 385 6. Altekruze SF, Stern NJ, Fields PI, Swerdlow DL. 1999. *Campylobacter jejuni*—an  
386 emerging foodborne pathogen. *Emerg Infect Dis* 5:28-35.  
387 <https://doi.org/10.3201/eid0501.990104>.
- 388 7. Ruzante J, Majowicz S, Fazil A, Davidson V. 2011. Hospitalization and deaths for select  
389 enteric illnesses and associated sequelae in Canada, 2001–2004. *Epidemiol Infect*  
390 139:937-945. <https://doi.org/10.1017/s0950268810001883>.
- 391 8. Yuki N, Hartung H-P. 2012. Guillain–Barré syndrome. *N Engl J Med* 366:2294-2304.  
392 <https://doi.org/10.1056/nejmra1114525>.
- 393 9. Miruzzi L, Callus A, Yamagata K, Cassar Maempel A. 2022. Case report of  
394 *Campylobacter jejuni*-associated myopericarditis: rare case of cardiac involvement by a  
395 common gastroenteritis pathogen. *Eur Heart J Case Rep* 6.  
396 <https://doi.org/10.1093/ehjcr/ytac043>.
- 397 10. Bhaduri S, Cottrell B. 2004. Survival of cold-stressed *Campylobacter jejuni* on ground  
398 chicken and chicken skin during frozen storage. *Appl Environ Microbiol* 70:7103-7109.  
399 <https://doi.org/10.1128/aem.70.12.7103-7109.2004>.
- 400 11. Chaisowong W, Kusumoto A, Hashimoto M, Harada T, Maklon K, Kawamoto K. 2011.  
401 Physiological characterization of *Campylobacter jejuni* under cold stresses conditions:  
402 its potential for public threat. *J Vet Med Sci* 74:43-50. [https://doi.org/10.1292/jvms.11-](https://doi.org/10.1292/jvms.11-0305)  
403 [0305](https://doi.org/10.1292/jvms.11-0305).
- 404 12. Horton AJ, Hak KM, Steffan RJ, Foster JW, Bej AK. 2000. Adaptive response to cold  
405 temperatures and characterization of *cspA* in *Salmonella typhimurium* LT2. *Antonie Van*  
406 *Leeuwenhoek* 77:13-20. <https://doi.org/10.1023/a:1002055719798>.
- 407 13. Etchegaray J-P, Inouye M. 1999. CspA, CspB, and CspG, major cold shock proteins of  
408 *Escherichia coli*, are induced at low temperature under conditions that completely block  
409 protein synthesis. *J Bacteriol* 181:1827-1830. [https://doi.org/10.1128/jb.181.6.1827-](https://doi.org/10.1128/jb.181.6.1827-1830.1999)  
410 [1830.1999](https://doi.org/10.1128/jb.181.6.1827-1830.1999).
- 411 14. Horn G, Hofweber R, Kremer W, Kalbitzer HR. 2007. Structure and function of bacterial  
412 cold shock proteins. *Cell Mol Life Sci* 64:1457-1470. [https://doi.org/10.1007/s00018-007-](https://doi.org/10.1007/s00018-007-6388-4)  
413 [6388-4](https://doi.org/10.1007/s00018-007-6388-4).
- 414 15. Goldstein J, Pollitt NS, Inouye M. 1990. Major cold shock protein of *Escherichia coli*.

- 415 Proc Natl Acad Sci U S A 87:283-287. <https://doi.org/10.1073/pnas.87.1.283>.
- 416 16. Schindelin H, Jiang W, Inouye M, Heinemann U. 1994. Crystal structure of CspA, the  
417 major cold shock protein of *Escherichia coli*. Proc Natl Acad Sci U S A 91:5119-5123.  
418 <https://doi.org/10.1073/pnas.91.11.5119>.
- 419 17. Saibil H. 2013. Chaperone machines for protein folding, unfolding and disaggregation.  
420 Nat Rev Mol Cell Biol 14:630-642. <https://doi.org/10.1038/nrm3658>.
- 421 18. Emran TB. 2019. Cold Shock and thawing effect on the growth of *Escherichia coli*. EC  
422 Microbiol 15:36-43.
- 423 19. Stintzi A, Whitworth L. 2003. Investigation of the *Campylobacter jejuni* cold-shock  
424 response by global transcript profiling. Genome Lett 2:18-27.  
425 <https://doi.org/10.1166/gl.2003.000>.
- 426 20. Garénaux A, Ritz M, Jugiau F, Rama F, Federighi M, de Jonge R. 2009. Role of oxidative  
427 stress in *C. jejuni* inactivation during freeze-thaw treatment. Curr Microbiol 58:134-138.  
428 <https://doi.org/10.1007/s00284-008-9289-3>.
- 429 21. Cornelis P, Wei Q, Andrews SC, Vinckx T. 2011. Iron homeostasis and management of  
430 oxidative stress response in bacteria. Metallomics 3:540-549.  
431 <https://doi.org/10.1039/c1mt00022e>.
- 432 22. McHugh JP, Rodríguez-Quñones F, Abdul-Tehrani H, Svistunenko DA, Poole RK,  
433 Cooper CE, Andrews SC. 2003. Global iron-dependent gene regulation in *Escherichia*  
434 *coli*. J Biol Chem 278:29478-29486. <https://doi.org/10.1074/jbc.m303381200>.
- 435 23. Galaris D, Barbouti A, Pantopoulos K. 2019. Iron homeostasis and oxidative stress: an  
436 intimate relationship. Biochim Biophys Acta 1866:118535.  
437 <https://doi.org/10.1016/j.bbamcr.2019.118535>.
- 438 24. Hong Y, Li L, Luan G, Drlica K, Zhao X. 2017. Contribution of reactive oxygen species  
439 to thymineless death in *Escherichia coli*. Nat Microbiol 2:1667-1675.  
440 <https://doi.org/10.1038/s41564-017-0037-y>.
- 441 25. Kim J, Park H, Kim J, Kim JH, Jung JI, Cho S, Ryu S, Jeon BJM. 2019. Comparative  
442 analysis of aerotolerance, antibiotic resistance, and virulence gene prevalence in  
443 *Campylobacter jejuni* isolates from retail raw chicken and duck meat in South Korea.  
444 Microorganisms 7:433. <https://doi.org/10.3390/microorganisms7100433>.
- 445 26. Chan KF, Le Tran H, Kanenaka RY, Kathariou S. 2001. Survival of clinical and poultry-  
446 derived isolates of *Campylobacter jejuni* at a low temperature (4°C). Appl Environ  
447 Microbiol 67:4186-4191. <https://doi.org/10.1128/aem.67.9.4186-4191.2001>.
- 448 27. Melo RT, Nalevaiko PC, Mendonça EP, Borges LW, Fonseca BB, Beletti ME, Rossi DA.  
449 2013. *Campylobacter jejuni* strains isolated from chicken meat harbour several virulence  
450 factors and represent a potential risk to humans. Food Control 33:227-231.  
451 <https://doi.org/10.1016/j.foodcont.2013.02.032>.
- 452 28. Touati D. 2000. Iron and oxidative stress in bacteria. Arch Biochem Biophys 373:1-6.  
453 <https://doi.org/10.1006/abbi.1999.1518>.
- 454 29. Park S, Imlay JA. 2003. High levels of intracellular cysteine promote oxidative DNA  
455 damage by driving the fenton reaction. J Bacteriol 185:1942-1950.  
456 <https://doi.org/10.1128/jb.185.6.1942-1950>.
- 457 30. Habib I, Uyttendaele M, De Zutter L. 2010. Survival of poultry-derived *Campylobacter*  
458 *jejuni* of multilocus sequence type clonal complexes 21 and 45 under freeze, chill,  
459 oxidative, acid and heat stresses. Food Microbiol 27:829-834.  
460 <https://doi.org/10.1016/j.fm.2010.04.009>.

- 461 31. Wei B, Kang M, Jang HK. 2019. Genetic characterization and epidemiological  
462 implications of *Campylobacter* isolates from wild birds in South Korea. *Transbound*  
463 *Emerg Dis* 66:56-65. <https://doi.org/10.1111/tbed.12931>.
- 464 32. Epping L, Walther B, Piro RM, Knüver M-T, Huber C, Thürmer A, Flieger A, Fruth A,  
465 Janecko N, Wieler LH, Stingl K, Semmler T. 2021. Genome-wide insights into population  
466 structure and host specificity of *Campylobacter jejuni*. *Sci Rep* 11:10358-10358.  
467 <https://doi.org/10.1038/s41598-021-89683-6>.
- 468 33. Zhang L, Li Y, Shao Y, Hu Y, Lou H, Chen X, Wu Y, Mei L, Zhou B, Zhang X. 2020.  
469 Molecular characterization and antibiotic resistant profiles of *Campylobacter* species  
470 isolated from poultry and diarrheal patients in southeastern China 2017–2019. *Front*  
471 *Microbiol* 11:1244. <https://doi.org/10.3389/fmicb.2020.01244>.
- 472 34. Gahamanyi N, Song D-G, Yoon K-Y, Mboera LE, Matee MI, Mutangana D, Amachawadi  
473 RG, Komba EV, Pan C-H. 2021. Antimicrobial resistance profiles, virulence genes, and  
474 genetic diversity of thermophilic *Campylobacter* species isolated from a layer poultry  
475 farm in Korea. *Front Microbiol* 12:622275. <https://doi.org/10.3389/fmicb.2021.622275>.
- 476 35. Sheppard SK, Cheng L, Méric G, de Haan CPA, Llarena A-K, Marttinen P, Vidal A, Ridley  
477 A, Clifton-Hadley F, Connor TR, Strachan NJC, Forbes K, Colles FM, Jolley KA, Bentley  
478 SD, Maiden MCJ, Hänninen M-L, Parkhill J, Hanage WP, Corander J. 2014. Cryptic  
479 ecology among host generalist *Campylobacter jejuni* in domestic animals. *Mol Ecol*  
480 23:2442-2451. <https://doi.org/10.1111/mec.12742>.
- 481 36. Friedrich A, Marshall JC, Biggs PJ, Midwinter AC, French NP. 2016. Seasonality of  
482 *Campylobacter jejuni* isolates associated with human campylobacteriosis in the  
483 Manawatu region, New Zealand. *Epidemiol Infect* 144:820-828.  
484 <https://doi.org/10.1017/s0950268815002009>.
- 485 37. McCarthy ND, Gillespie IA, Lawson AJ, Richardson J, Neal KR, Hawtin PR, Maiden MC,  
486 O'Brien SJ. 2012. Molecular epidemiology of human *Campylobacter jejuni* shows  
487 association between seasonal and international patterns of disease. *Epidemiol Infect*  
488 140:2247-55. <https://doi.org/10.1017/s0950268812000192>.
- 489 38. Cao H, Xu H, Ning C, Xiang L, Ren Q, Zhang T, Zhang Y, Gao R. 2021. Multi-omics  
490 approach reveals the potential core vaccine targets for the emerging foodborne pathogen  
491 *Campylobacter jejuni*. *Front Microbiol* 12:665858.  
492 <https://doi.org/10.3389/fmicb.2021.665858>.
- 493 39. Peters S, Pascoe B, Wu Z, Bayliss SC, Zeng X, Edwinson A, Veerabadhran-Gurunathan  
494 S, Jawahir S, Calland JK, Mourkas E. 2021. *Campylobacter jejuni* genotypes are  
495 associated with post-infection irritable bowel syndrome in humans. *Commun Biol* 4:1-17.  
496 <https://doi.org/10.1038/s42003-021-02554-8>.
- 497 40. Naikare H, Palyada K, Panciera R, Marlow D, Stintzi A. 2006. Major role for FeoB in  
498 *Campylobacter jejuni* ferrous iron acquisition, gut colonization, and intracellular survival.  
499 *Infect Immun* 74:5433-5444. <https://doi.org/10.1128/iai.00052-06>.
- 500 41. Stead D, Park SF. 2000. Roles of Fe superoxide dismutase and catalase in resistance of  
501 *Campylobacter coli* to freeze-thaw stress. *Appl Environ Microbiol* 66:3110-3112.  
502 <https://doi.org/10.1128/aem.66.7.3110-3112.2000>.
- 503 42. Chattopadhyay MK, Raghu G, Sharma YV, Biju AR, Rajasekharan MV, Shivaji S. 2011.  
504 Increase in oxidative stress at low temperature in an antarctic bacterium. *Curr Microbiol*  
505 62:544-6. <https://doi.org/10.1007/s00284-010-9742-y>.
- 506 43. Oh E, McMullen LM, Chui L, Jeon BJ. 2017. Differential survival of hyper-aerotolerant

- 507 *Campylobacter jejuni* under different gas conditions. *Front Microbiol* 8:954.  
508 <https://doi.org/10.3389/fmicb.2017.00954>
- 509 44. Jeon B, Muraoka W, Scupham A, Zhang Q. 2009. Roles of lipooligosaccharide and  
510 capsular polysaccharide in antimicrobial resistance and natural transformation of  
511 *Campylobacter jejuni*. *J Antimicrob Chemother* 63:462-468.  
512 <https://doi.org/10.1093/jac/dkn529>.
- 513 45. Hwang S, Ryu S, Jeon B. 2013. Roles of the superoxide dismutase SodB and the catalase  
514 KatA in the antibiotic resistance of *Campylobacter jejuni*. *J Antibiot (Tokyo)* 66:351-353.  
515 <https://doi.org/10.1038/ja.2013.20>.
- 516 46. Hwang S, Kim M, Ryu S, Jeon B. 2011. Regulation of oxidative stress response by CosR,  
517 an essential response regulator in *Campylobacter jejuni*. *PloS One* 6:e22300.  
518 <https://doi.org/10.1371/journal.pone.0022300>.
- 519 47. Karlyshev A, Wren B. 2005. Development and application of an insertional system for  
520 gene delivery and expression in *Campylobacter jejuni*. *Appl Environ Microbiol* 71:4004-  
521 4013. <https://doi.org/10.1128/aem.71.7.4004-4013.2005>.
- 522 48. Oh E, Jeon B. 2014. Role of alkyl hydroperoxide reductase (AhpC) in the biofilm  
523 formation of *Campylobacter jejuni*. *PLoS One* 9:e87312.  
524 <https://doi.org/10.1371/journal.pone.0087312>.
- 525 49. Xu F, Zeng X, Haigh RD, Ketley JM, Lin J. 2010. Identification and characterization of a  
526 new ferric enterobactin receptor, CfrB, in *Campylobacter*. *J Bacteriol* 192:4425-35.  
527 <https://doi.org/10.1128/jb.00478-10>.
- 528 50. Zeng X, Xu F, Lin J. 2009. Molecular, antigenic, and functional characteristics of ferric  
529 enterobactin receptor CfrA in *Campylobacter jejuni*. *Infect Immun* 77:5437-48.  
530 <https://doi.org/10.1128/iai.00666-09>.
- 531 **51.** Oh E, Andrews KJ, Jeon B. 2018. Enhanced biofilm formation by ferrous and ferric Iron  
532 through oxidative stress in *Campylobacter jejuni*. *Front Microbiol* 9:1204.  
533 <https://doi.org/10.3389/fmicb.2018.01204>.

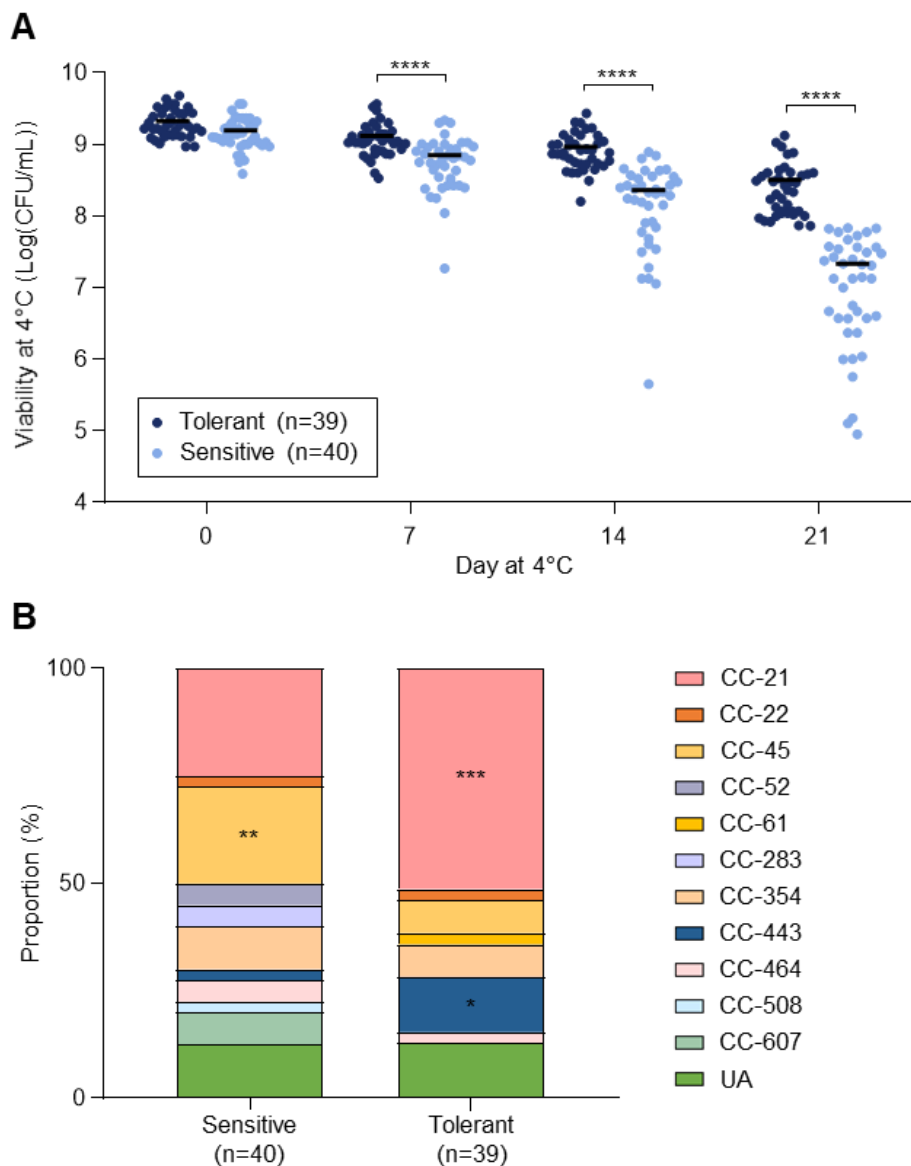

534

535 **Figure 1. Different levels of cold stress tolerance in *C. jejuni* isolates from retail chicken and**

536 **differences in proportions of MLST CCs between cold stress-sensitive and cold stress-**

537 **tolerant strains. (A) Viable counts of 79 *C. jejuni* strains were measured at 0, 7, 14, and 21 days**

538 **of exposure at 4°C. The Student's *t* test was performed to compare viability between cold stress-**

539 **sensitive and cold stress-tolerant strains. A solid black bar indicates the mean. The data are**

540 **representative of three independent experiments showing similar results. (B) MLST CCs of the**

541 **cold stress-sensitive and cold stress-tolerant strains were grouped based on viability after cold**

542 stress exposure for 21 days. A chi-square test was conducted to determine whether the CC  
543 proportions were statistically related to cold stress tolerance. \*,  $P < 0.05$ ; \*\*,  $P < 0.01$ ; \*\*\*,  $P < 0.001$ ;  
544 \*\*\*\*,  $P < 0.0001$ ; CC, clonal complex; UA, unassigned to any CC defined.

545

546

547

548

549

550

551

552

553

554

555

556

557

558

559

560

561

562

563

564



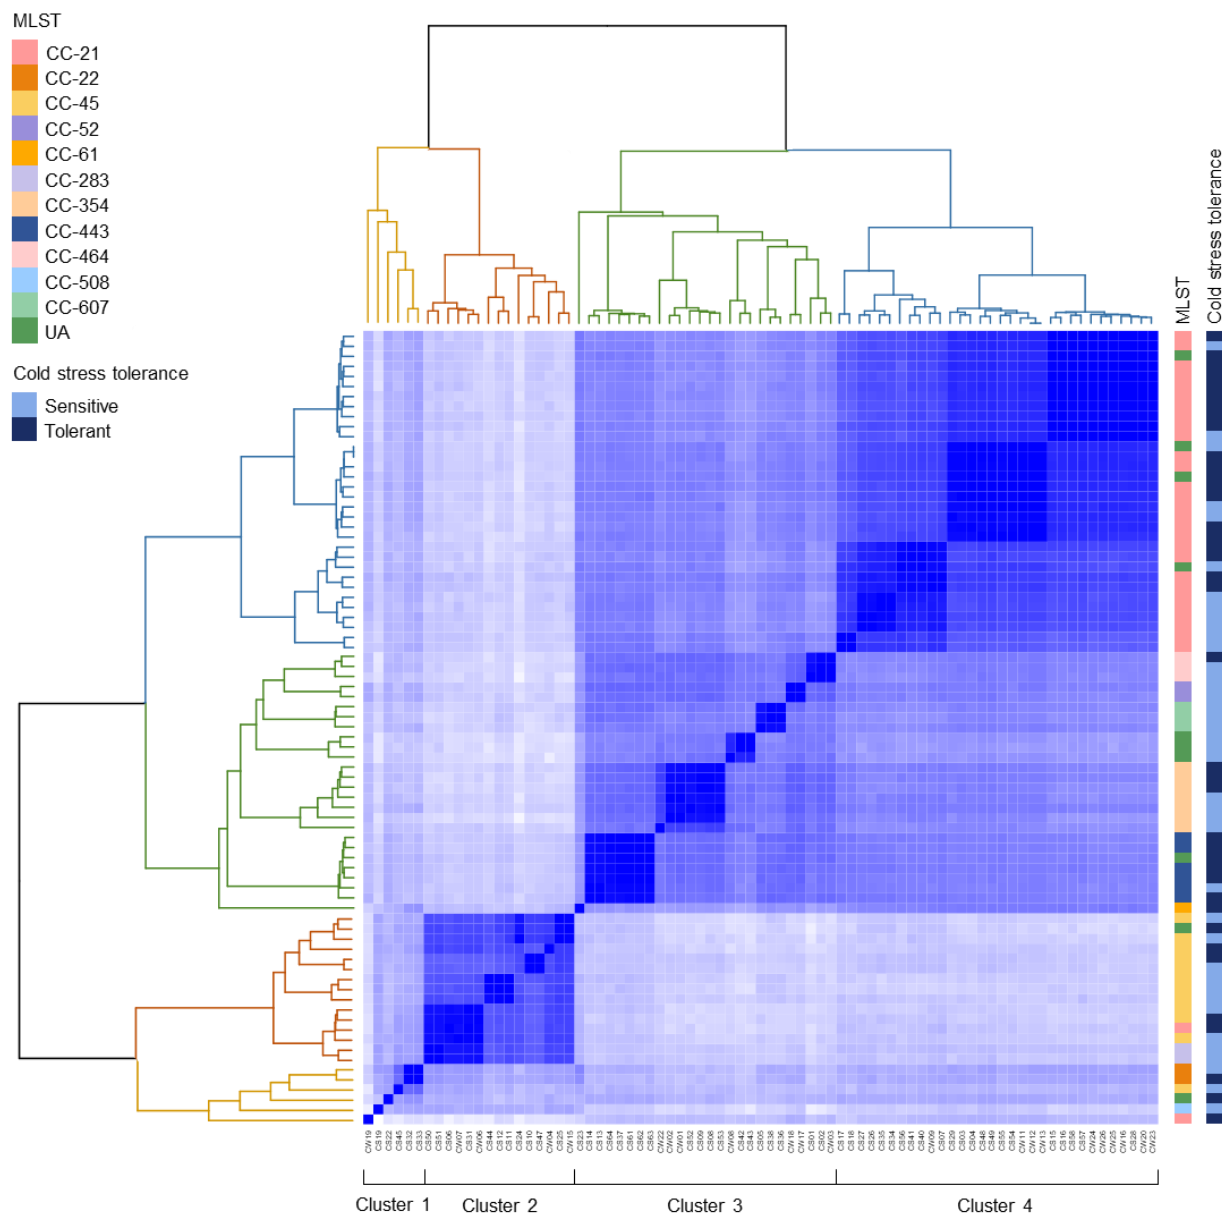

565  
566 **Figure 2. Identification of phylogenetic clusters related to cold stress tolerance in *C. jejuni*.**  
567 Genome-wide ANI values separated 79 *C. jejuni* strains into four clusters: Cluster 1 (yellow, n=6),  
568 Cluster 2 (orange, n=15), Cluster 3 (green, n=26), and Cluster 4 (blue, n=32). The information  
569 about MLST and cold stress tolerance of 79 *C. jejuni* strains is indicated on the right side of the  
570 heatmap. CC, clonal complex; UA, unassigned to any CC defined.

571

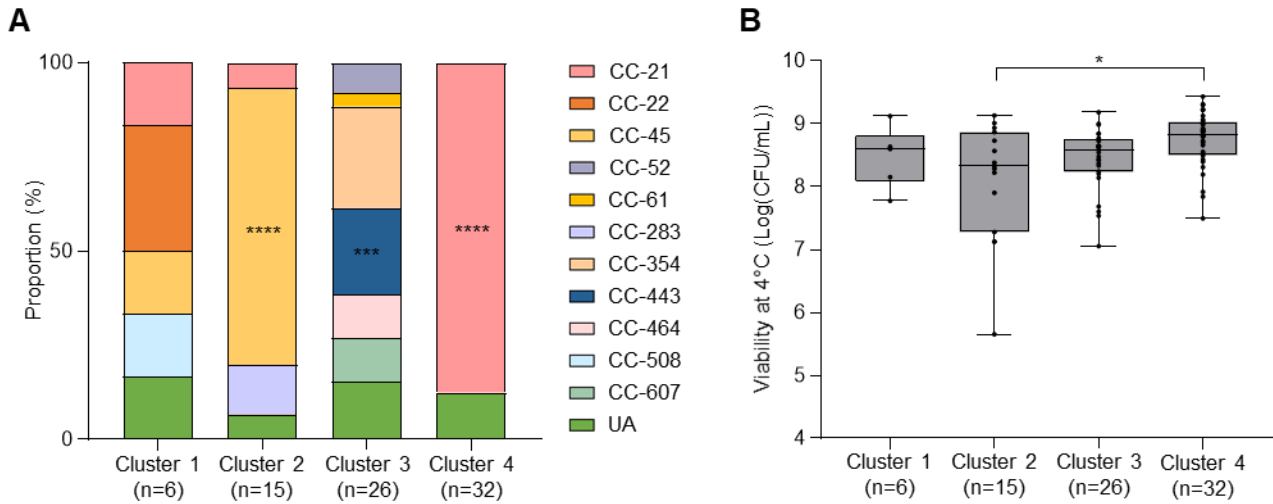

572

573

574 **Figure 3. Association of phylogenetic clusters with MLST CCs and cold stress tolerance. (A)**

575 Proportions of MLST CCs in the four phylogenetic clusters. A chi-square test was conducted for

576 statistical analysis. (B) Viability at 4°C for 21 days of *C. jejuni* strains of the four phylogenetic

577 clusters. The results indicate means and standard deviations. The Student's *t* test was performed

578 to compare viability between the two clusters. \*,  $P < 0.05$ ; \*\*\*,  $P < 0.001$ ; \*\*\*\*,  $P < 0.0001$ ; CC,

579 clonal complex; UA, unassigned to any CC defined.

580

581

582

583

584

585

586

587

588

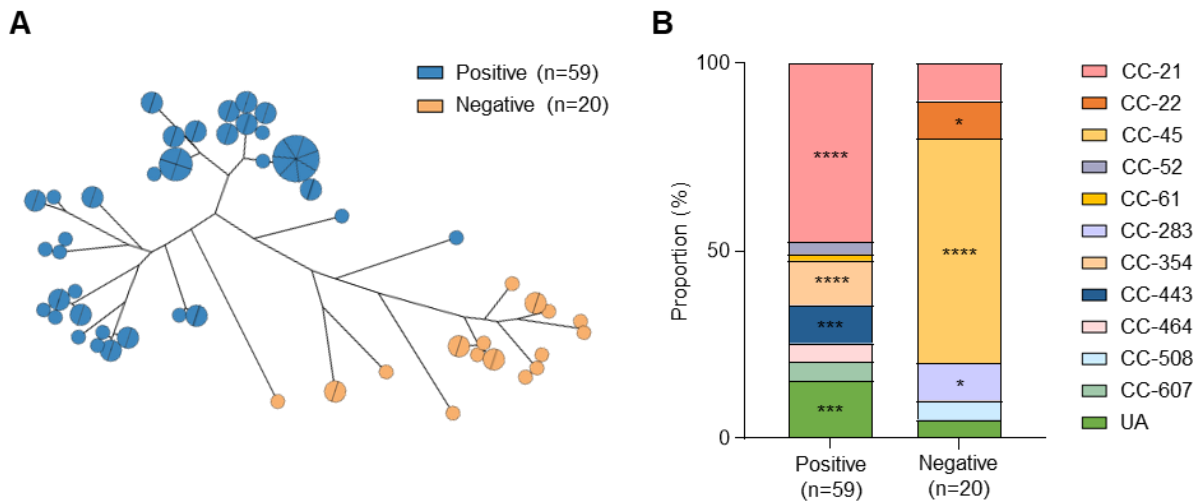

589

590

591 **Figure 4. Phylogenetic distinction and MLST CC composition depending on the presence of**

592 *cfrA*. (A) The minimum spanning tree was generated by core gene alignment obtained from pan-

593 genome analysis. (B) MLST CCs of 79 *C. jejuni* strains were compared between *cfrA*-positive and

594 *cfrA*-negative phylogenies. A chi-square test was conducted for comparison of the proportions of

595 the CCs. \*,  $P < 0.05$ ; \*\*\*,  $P < 0.001$ ; \*\*\*\*,  $P < 0.0001$ ; CC, clonal complex; UA, unassigned to any

596 CC defined.

597

598

599

600

601

602

603

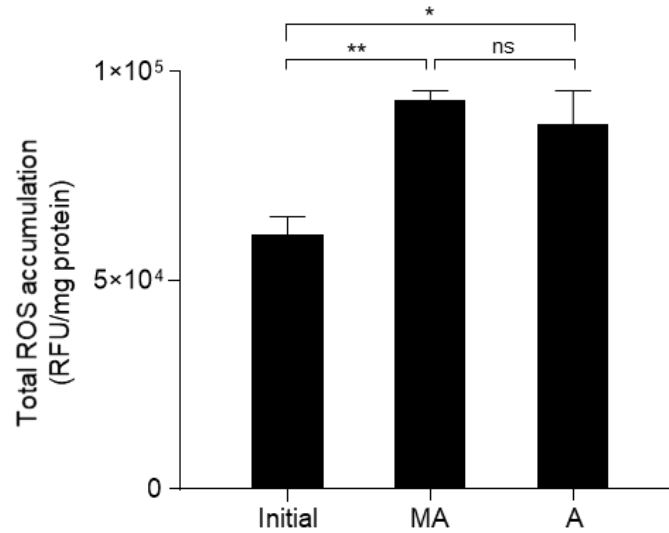

604

605

606 **Figure 5. Increased oxidative stress after exposure to cold stress in *C. jejuni* under**

607 **microaerobic and aerobic conditions.** Total ROS accumulation levels were measured before

608 (Initial) and after exposure to cold stress for 4 days under microaerobic (MA) or aerobic (A)

609 conditions. The experiment was repeated three times. Each bar indicates the standard error of the

610 means. The Student's *t* test was performed for statistical analysis. \*,  $P < 0.05$ ; \*\*,  $P < 0.01$ ; ns, non-

611 significant; RFU, relative fluorescence units.

612

613

614

615

616

617

618

619

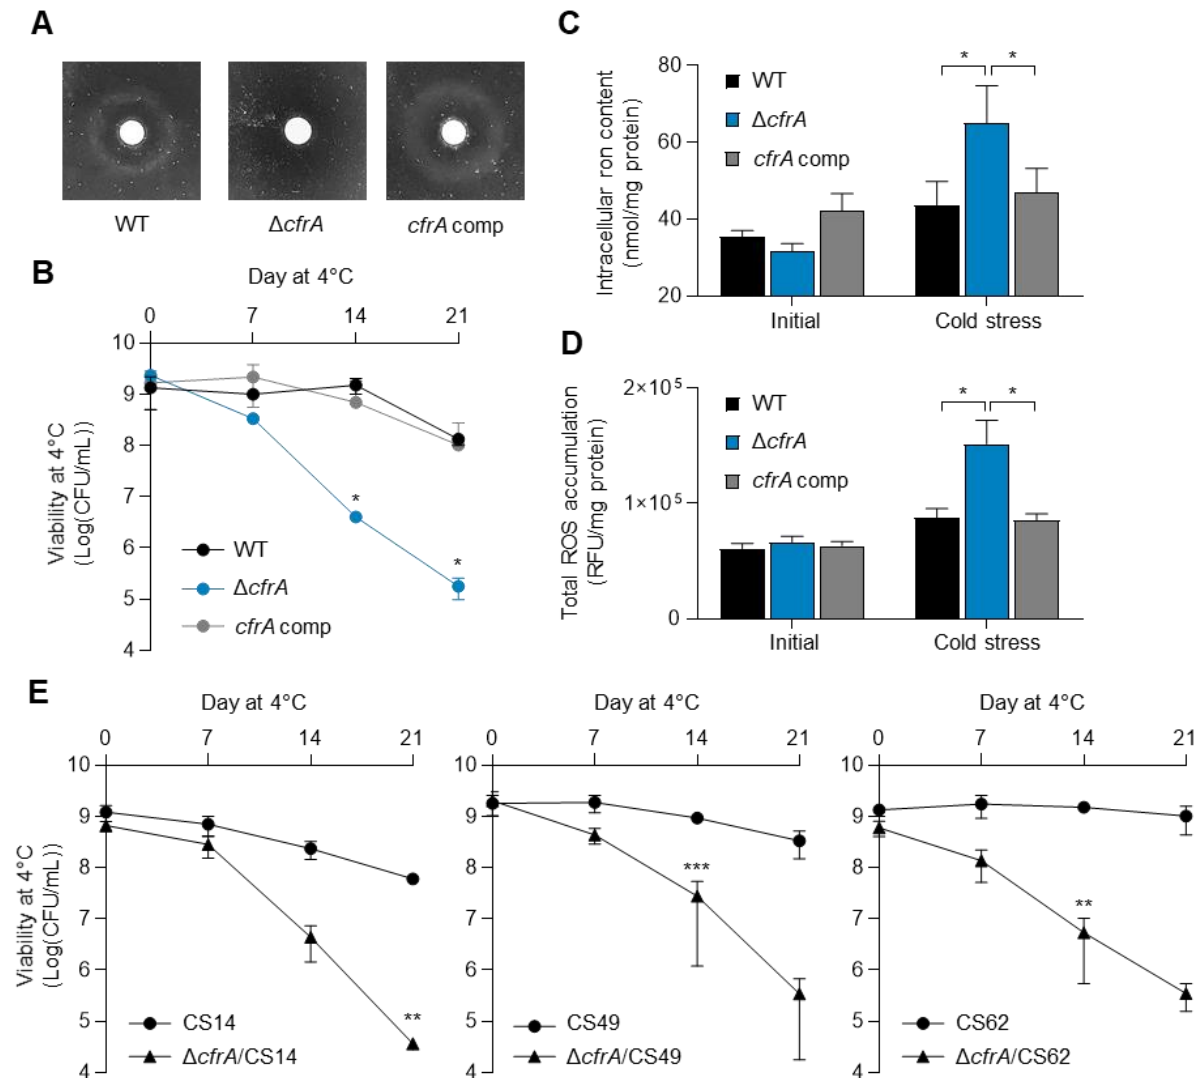

620

621

622 **Figure 6. Contribution of *cfrA* to cold stress tolerance in *C. jejuni*.** (A) The inability of a  $\Delta cfrA$

623 mutant to take up enterobactin. (B) Defective cold stress tolerance in the  $\Delta cfrA$  mutant. The

624 asterisk indicates a significant difference in viability between the  $\Delta cfrA$  mutant and WT at the

625 same sampling time. (C) Intracellular iron levels in *C. jejuni* before and after exposure to cold

626 stress at 4°C for 4 days. (D) Total ROS accumulation in *C. jejuni* before and after exposure to cold

627 stress for 4 days. (E) Significant defects in cold stress tolerance in three cold stress-tolerant strains

628 of *C. jejuni*. The asterisks indicate the statistical significance of differences in viability between

629 the  $\Delta cfrA$  mutant and wild type at the same sampling time after exposure to cold stress. The  
630 experiment was repeated three times and produced similar results. The error bars show the standard  
631 errors of the means. The Student's *t* test was performed for statistical analysis. \*,  $P < 0.05$ ; \*\*,  $P <$   
632  $0.01$ ; \*\*\*,  $P < 0.001$ ; WT, *C. jejuni* NCTC 11168 wild type;  $\Delta cfrA$ ,  $\Delta cfrA$  mutant; *cfrA* comp, *cfrA*-  
633 complemented strain.

634 **Table 1. Fifty-eight genes present in the cold-tolerant cluster and absent in the cold-**  
 635 **sensitive cluster**

| Locus tag                                                    | Gene         | Description                                                        |
|--------------------------------------------------------------|--------------|--------------------------------------------------------------------|
| Inorganic ion transport and metabolism                       |              |                                                                    |
| <i>cj0444</i>                                                | pseudogene   | TonB-dependent receptor                                            |
| <i>cj0676</i>                                                | <i>kdpA</i>  | potassium-transporting ATPase subunit KdpA                         |
| <i>cj0755</i>                                                | <i>cfrA</i>  | ferric enterobactin receptor CfrA                                  |
| <i>cj1040c</i>                                               |              | MFS transporter                                                    |
| <i>cj1415c</i>                                               | <i>cysC</i>  | adenylyl-sulfate kinase                                            |
| Amino acid transport and metabolism                          |              |                                                                    |
| <i>cj0029</i>                                                | <i>ansA</i>  | type II asparaginase                                               |
| <i>cj0481</i>                                                | <i>dapA</i>  | dihydrodipicolinate synthase family protein                        |
| <i>cj0763c</i>                                               | <i>hisS</i>  | histidine--tRNA ligase                                             |
| <i>cj0817</i>                                                | <i>glnH</i>  | transporter substrate-binding domain-containing protein            |
| <i>cj1726c</i>                                               | <i>metA</i>  | homoserine O-succinyltransferase                                   |
| <i>cj1727c</i>                                               | <i>metB</i>  | O-acetylhomoserine aminocarboxypropyltransferase/cysteine synthase |
| Defense mechanisms                                           |              |                                                                    |
| <i>cj0139</i>                                                |              | hypothetical protein                                               |
| <i>cj0690c</i>                                               |              | SAM-dependent DNA methyltransferase                                |
| <i>cj1549c</i>                                               | <i>hsdR</i>  | type I restriction endonuclease subunit R                          |
| <i>cj1551c</i>                                               | <i>hsdS</i>  | restriction endonuclease subunit S                                 |
| <i>cj1553c</i>                                               | <i>hsdM</i>  | SAM-dependent DNA methyltransferase                                |
| Transcription                                                |              |                                                                    |
| <i>cj0480c</i>                                               |              | IcIR family transcriptional regulator                              |
| <i>cj0757</i>                                                | <i>hrcA</i>  | HrcA family transcriptional regulator                              |
| <i>cj1552c</i>                                               | <i>mloB</i>  | transcriptional regulator                                          |
| <i>cj1556</i>                                                |              | helix-turn-helix transcriptional regulator                         |
| Carbohydrate transport and metabolism                        |              |                                                                    |
| <i>cj0482</i>                                                | <i>uxaA'</i> | UxaA family hydrolase                                              |
| <i>cj0483</i>                                                | <i>uxaA'</i> | UxaA family hydrolase                                              |
| <i>cj0484</i>                                                |              | MFS transporter                                                    |
| Secondary metabolites biosynthesis, transport and catabolism |              |                                                                    |
| <i>cj0170</i>                                                |              | methyltransferase domain-containing protein                        |
| <i>cj1325</i>                                                |              | methyltransferase domain-containing protein                        |
| <i>cj1420c</i>                                               |              | class I SAM-dependent methyltransferase                            |
| Energy production and conversion                             |              |                                                                    |
| <i>cj0490</i>                                                | <i>ald'</i>  | aldehyde dehydrogenase                                             |
| <i>cj1585c</i>                                               |              | FAD-binding oxidoreductase                                         |
| Nucleotide transport and metabolism                          |              |                                                                    |
| <i>cj0766</i>                                                | pseudogene   | Putative arylsulfate sulfotransferase                              |

|                                                               |             |                                        |
|---------------------------------------------------------------|-------------|----------------------------------------|
| <i>cj0381c</i>                                                | <i>pyrF</i> | orotidine-5'-phosphate decarboxylase   |
| General function prediction only                              |             |                                        |
| <i>cj0054c</i>                                                |             | TIGR00730 family Rossmann fold protein |
| <i>cj1555c</i>                                                |             | NAD(P)-dependent oxidoreductase        |
| Lipid transport and metabolism                                |             |                                        |
| <i>cj0485</i>                                                 |             | SDR family oxidoreductase              |
| Posttranslational modification, protein turnover, chaperones  |             |                                        |
| <i>cj1725</i>                                                 |             | NAD(P)/FAD-dependent oxidoreductase    |
| Intracellular trafficking, secretion, and vesicular transport |             |                                        |
| <i>cj0969</i>                                                 | pseudogene  | hemagglutination domain protein        |
| Function unknown                                              |             |                                        |
| <i>cj0055c</i>                                                |             | hypothetical protein                   |
| <i>cj0056c</i>                                                |             | hypothetical protein                   |
| <i>cj0247c</i>                                                |             | chemotaxis protein                     |
| <i>cj0380c</i>                                                |             | hypothetical protein                   |
| <i>cj0425</i>                                                 |             | hypothetical protein                   |
| <i>cj0565</i>                                                 |             | hypothetical protein                   |
| <i>cj0566</i>                                                 |             | hypothetical protein                   |
| <i>cj0568</i>                                                 |             | hypothetical protein                   |
| <i>cj0569</i>                                                 |             | hypothetical protein                   |
| <i>cj0617</i>                                                 |             | DUF2920 family protein                 |
| <i>cj0685c</i>                                                | <i>cipA</i> | DUF2972 domain-containing protein      |
| <i>cj0740</i>                                                 |             | hypothetical protein                   |
| <i>cj0818</i>                                                 |             | hypothetical protein                   |
| <i>cj0859c</i>                                                |             | hypothetical protein                   |
| <i>cj0866</i>                                                 | pseudogene  | arylsulfate sulfotransferase           |
| <i>cj0970</i>                                                 |             | hypothetical protein                   |
| <i>cj0972</i>                                                 |             | hypothetical protein                   |
| <i>cj0978c</i>                                                |             | putative lipoprotein                   |
| <i>cj1122c</i>                                                |             | hypothetical protein                   |
| <i>cj1456c</i>                                                |             | hypothetical protein                   |
| <i>cj1550c</i>                                                | <i>rloH</i> | AAA family ATPase                      |
| <i>cj1558</i>                                                 |             | Permease                               |
| <i>cj1714</i>                                                 |             | small hydrophobic protein              |
