# Supplementary material for: Phylogenetic Association and Genetic Factors in Cold Stress Tolerance in Campylobacter jejuni
Source: bioRxiv or medRxiv preprint supplement (doi:10.1101/2022.08.13.503864), 2022-08-13
Supplement: Supplementary file [file media-1.pdf]

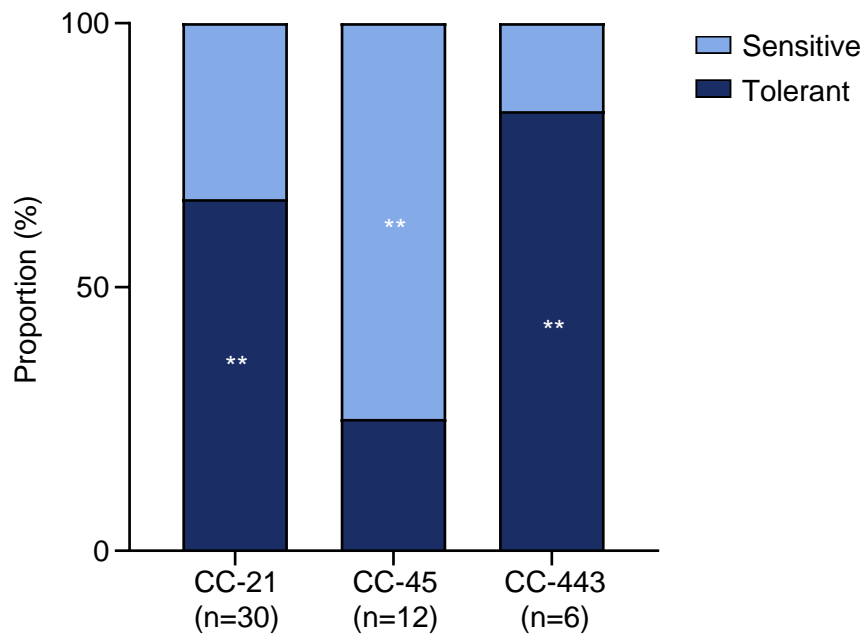

**Figure S1. Distribution of cold stress tolerance of strains among CC-21, CC-45, and CC-443.** The proportions of cold stress-sensitive and cold stress-tolerant strains among CC-21, CC-45, and CC-443 were compared. A chi-square test was conducted for comparison of the proportions of cold stress-tolerant strains in the CCs. \*\*,  $P < 0.01$ ; CC, clonal complex.

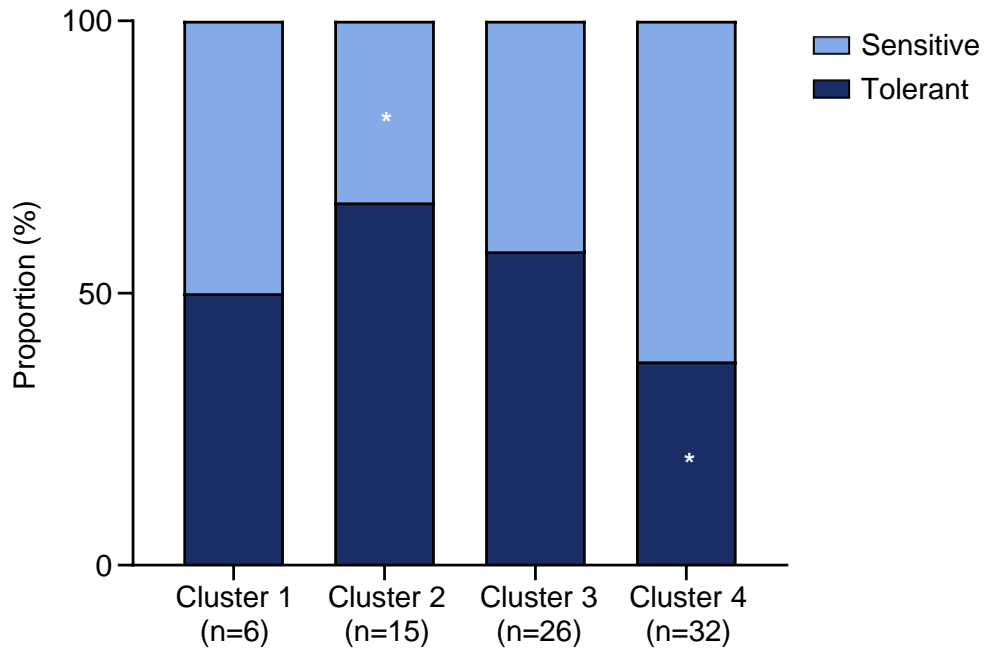

**Figure S2. Distribution of cold stress tolerance of strains belonging to the four Clusters.** The distribution of cold-sensitive strains (n=40) and cold-tolerant strains (n=39) in Cluster 1, Cluster 2, Cluster 3, and Cluster 4 was compared. A chi-square test was conducted to compare the proportions of cold stress-tolerant strains in the clusters. \*,  $P < 0.05$ .

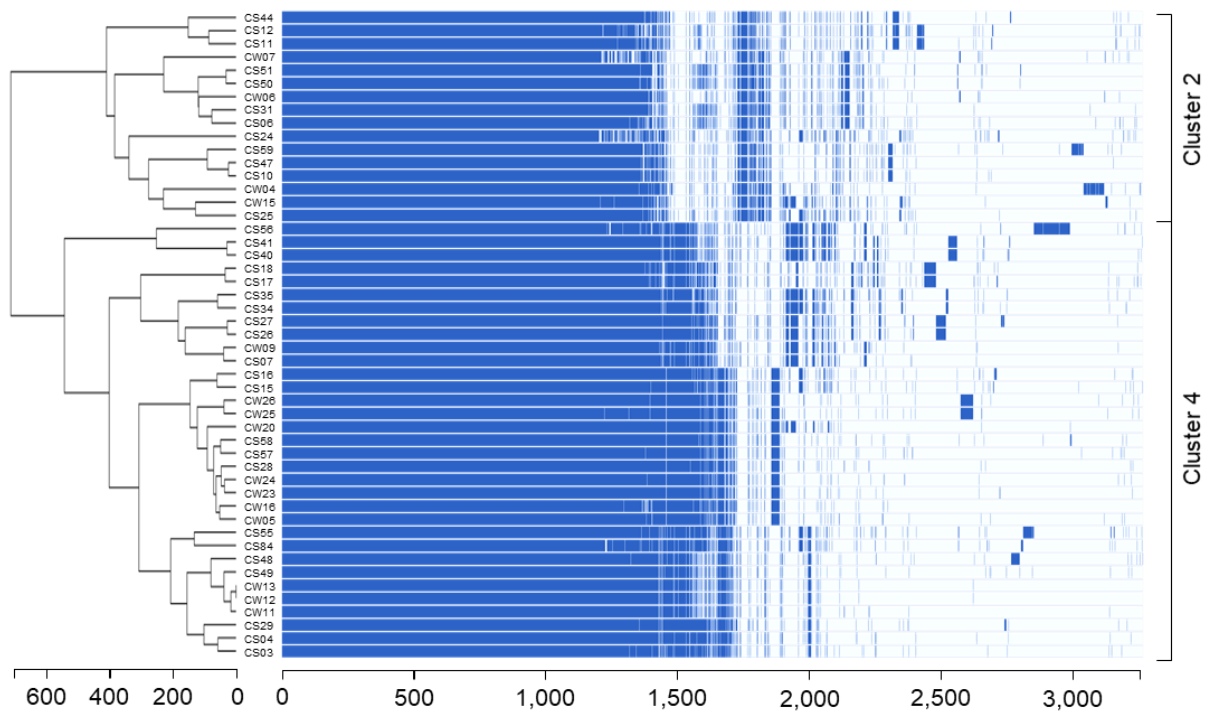

**Figure S3. Pan-genome map comparing cold-sensitive cluster (Cluster 2) and cold-tolerant cluster (Cluster 4).** A pan-genome map was generated with the 47 strains from Cluster 2 (n=15) and Cluster 4 (n=32).

**Table S1. Primers used in this study**

| <b>Primer</b>       | <b>Sequence (5' to 3')</b>          | <b>Reference</b> |
|---------------------|-------------------------------------|------------------|
| 16s-qPCR-F          | ATAAGCACCGGCTAACTCCG                | 1                |
| 16s-qPCR-R          | TTCCATCTGCCTCTCCCTCA                |                  |
| kan-F               | GCGATGAAGTGCCTAAG                   | 2                |
| kan-R               | CGGCTCCGTCGATACTATG                 |                  |
| cfrA-Sal1-F         | AAAGTCGACGCTAGCAGTTGAAGATTTGCAAA    | This study       |
| cfrA-BamH1-R        | AAAGGATCCCTGCGTTTTTCGTTTTCAAATTCCTG |                  |
| cfrA-inv-F          | GGCAAGGTTGAATACAAAGGTGT             |                  |
| cfrA-inv-R          | CCAGTAATACCCCTCATAGTGAT             |                  |
| cfrA-comp-Not11-F   | TTTGCGGCCGCGGTAAGAGCTGGCTTGTGGA     |                  |
| cfrA-comp-Not1-R    | AAAGCGGCCGCGGTATAGTCGAAGCAGGTAT     |                  |
| pFMBcomC-inv-Not1-F | GCGGCCGCAAGCTAATTGTTTATGGGGAATTAG   |                  |
| pFMBcomC-inv-Not1-R | GCGGCCGCTTATTACTTTGTACTCTAGGGGT     |                  |
| kan-conf-F          | CGGGGAAGAACAGTATGTCG                |                  |
| kan-conf-R          | CTCCCACCAGCTTATATACCTTA             |                  |
| pFMBcomC-F2         | CCTGTTTCTATGATACCGTGGA              |                  |
| pFMBcomC-R3         | GGGCCTAACAAGACTTGA ACTT             |                  |
| cfrA-conf-F1        | AATGCCTACAAAATCAAAGATAGTGATA        |                  |
| cfrA-conf-F2        | AAAGTCCAGGTAAATTCTACAAGAAC          |                  |
| cfrA-conf-F3        | AAAGGATAATGCACCTATTGGTTCTA          |                  |
| cfrA-conf-F4        | TTACAGGCTTTAGAACCCCTTATG            |                  |
| cfrA-conf-R1        | GTGGGGAGGTTCTTGTAGAATT              |                  |
| cfrA-conf-R2        | TTTTCTAGAGAGCCACTCCATGTTTTTCAAG     |                  |
| cfrA-conf-R3        | ATTCCTGGACTTGTGATGGTTCC             |                  |
| cfrA-conf-R4        | CTGCCTTGGCCACTATAACTG               |                  |
| cfrA-P/A-F          | TTTGTCGCAGAAGATATTATCTTAGATA        |                  |
| cfrA-P/A-R          | TTGTATCACCCATATAGCGATCTATTT         |                  |
| cfrA-RT-F           | CCTGCTACTATCAATGTTATCAC             |                  |
| cfrA-RT-R           | CTGACGACGCCATCAATCA                 |                  |

**Table S2. The GenBank accession numbers of the genome sequences of the 79 *C. jejuni* isolates used in the study**

| Sample name | Genome Accession |
|-------------|------------------|
| CS01        | JAMGEB000000000  |
| CS02        | JAMGEA000000000  |
| CS03        | JAMGDZ000000000  |
| CS04        | JAMGDY000000000  |
| CS05        | JAMGDX000000000  |
| CS06        | JAMHFV000000000  |
| CS07        | JAMGDW000000000  |
| CS08        | JAMGDV000000000  |
| CS09        | JAMGDU000000000  |
| CS10        | JAMHFU000000000  |
| CS11        | JAMGDT000000000  |
| CS12        | JAMGDS000000000  |
| CS13        | JAMGDR000000000  |
| CS14        | JAMGDQ000000000  |
| CS15        | JAMHFT000000000  |
| CS16        | JAMHFS000000000  |
| CS17        | JAMHFR000000000  |
| CS18        | JAMGDP000000000  |
| CS19        | JAMHFQ000000000  |
| CS22        | JAMGDO000000000  |
| CS23        | JAMGDN000000000  |
| CS24        | JAMGDM000000000  |
| CS25        | JAMGDL000000000  |
| CS26        | JAMGDK000000000  |
| CS27        | JAMGDJ000000000  |
| CS28        | JAMGDI000000000  |
| CS29        | JAMHFP000000000  |
| CS31        | JAMGDH000000000  |
| CS32        | JAMGDG000000000  |
| CS33        | JAMGDF000000000  |
| CS34        | JAMGDE000000000  |
| CS35        | JAMGDD000000000  |
| CS36        | JAMGDC000000000  |
| CS37        | JAMGDB000000000  |
| CS38        | JAMGDA000000000  |
| CS40        | JAMGCZ000000000  |
| CS41        | JAMGCY000000000  |
| CS42        | JAMHFO000000000  |
| CS43        | JAMHFN000000000  |

|      |                 |
|------|-----------------|
| CS44 | JAMHFM000000000 |
| CS45 | JAMHFL000000000 |
| CS47 | JAMGCX000000000 |
| CS48 | JAMGCW000000000 |
| CS49 | JAMGCV000000000 |
| CS50 | JAMGCU000000000 |
| CS51 | JAMHFK000000000 |
| CS52 | JAMHFJ000000000 |
| CS53 | JAMGCT000000000 |
| CS54 | JAMHFI000000000 |
| CS55 | JAMWEZ000000000 |
| CS56 | JAMGCS000000000 |
| CS57 | JAMHFH000000000 |
| CS58 | JAMHFG000000000 |
| CS61 | JAMGCR000000000 |
| CS62 | JAMGCQ000000000 |
| CS63 | JAMHFF000000000 |
| CS64 | JAMHFE000000000 |
| CW01 | JAMGCP000000000 |
| CW02 | JAMGCO000000000 |
| CW03 | JAMGCN000000000 |
| CW04 | JAMGCM000000000 |
| CW06 | JAMGCL000000000 |
| CW07 | JAMGCK000000000 |
| CW08 | JAMGCJ000000000 |
| CW09 | JAMGCI000000000 |
| CW11 | JAMGCH000000000 |
| CW12 | JAMGCG000000000 |
| CW13 | JAMGCF000000000 |
| CW15 | JAMGCE000000000 |
| CW16 | JAMHFD000000000 |
| CW17 | JAMGCD000000000 |
| CW18 | JAMGCC000000000 |
| CW19 | JAMGCB000000000 |
| CW20 | JAMGCA000000000 |
| CW22 | JAMGBZ000000000 |
| CW23 | JAMGBY000000000 |
| CW24 | JAMGBX000000000 |
| CW25 | JAMGBW000000000 |
| CW26 | JAMGBV000000000 |

---

## References

1. Kim J, Hur JI, Ryu S, Jeon B. 2021. Bacteriophage-mediated modulation of bacterial competition during selective enrichment of *Campylobacter*. *Microbiol Spectr* 9:e0170321. <https://doi.org/10.1128/spectrum.01703-21>.
2. Oh E, Jeon B. 2014. Role of Alkyl Hydroperoxide Reductase (AhpC) in the Biofilm Formation of *Campylobacter jejuni*. *PloS One* 9:e87312. <https://doi.org/10.1371/journal.pone.0087312>.
